# Supplementary material
Source: MDPI journal article supplement (https://www.mdpi.com/2072-4292/13/21/4466)
Supplement: s1 [file s1]

a) Initial classification scheme

|                         |     | predicted |      |      |      |      |      |      |      |      |      |      |      |      |      |      |                          |      |
|-------------------------|-----|-----------|------|------|------|------|------|------|------|------|------|------|------|------|------|------|--------------------------|------|
|                         |     | bgr       | cru  | cas  | csu  | dry  | gra  | hea  | mbr  | meq  | hmo  | gru  | wdw  | mgr  | wet  | wat  | observation accuracy (%) |      |
| observed                | bgr | 709       | 27   | 6    | 0    | 0    | 11   | 0    | 0    | 0    | 6    | 25   | 14   | 0    | 0    | 8    | 88.0                     |      |
|                         | cru | 0         | 1138 | 2    | 0    | 1    | 46   | 59   | 0    | 0    | 5    | 22   | 64   | 1    | 42   | 0    | 82.5                     |      |
|                         | cas | 0         | 17   | 974  | 0    | 26   | 1    | 0    | 0    | 0    | 0    | 23   | 222  | 0    | 33   | 17   | 74.2                     |      |
|                         | csu | 0         | 0    | 0    | 534  | 0    | 0    | 0    | 0    | 0    | 0    | 0    | 0    | 0    | 0    | 0    | 100                      |      |
|                         | dry | 0         | 8    | 4    | 0    | 973  | 22   | 0    | 0    | 0    | 0    | 21   | 109  | 6    | 70   | 0    | 80.2                     |      |
|                         | gra | 7         | 65   | 0    | 0    | 16   | 411  | 2    | 0    | 0    | 0    | 44   | 13   | 17   | 0    | 0    | 71.5                     |      |
|                         | hea | 0         | 4    | 0    | 0    | 0    | 0    | 1406 | 0    | 0    | 59   | 0    | 0    | 0    | 23   | 0    | 94.2                     |      |
|                         | mbr | 0         | 0    | 25   | 0    | 0    | 0    | 0    | 242  | 0    | 0    | 6    | 0    | 0    | 72   | 0    | 70.1                     |      |
|                         | meq | 0         | 0    | 16   | 0    | 3    | 0    | 0    | 0    | 1079 | 0    | 30   | 8    | 90   | 41   | 0    | 85.2                     |      |
|                         | hmo | 0         | 0    | 8    | 0    | 0    | 0    | 8    | 0    | 0    | 832  | 14   | 15   | 0    | 45   | 0    | 90.2                     |      |
|                         | gru | 12        | 31   | 21   | 25   | 32   | 0    | 7    | 0    | 71   | 0    | 2071 | 47   | 85   | 242  | 0    | 78.3                     |      |
|                         | wdw | 0         | 100  | 204  | 0    | 44   | 0    | 0    | 0    | 0    | 0    | 24   | 1153 | 0    | 5    | 0    | 75.4                     |      |
|                         | mgr | 0         | 0    | 34   | 0    | 21   | 19   | 0    | 0    | 40   | 1    | 132  | 12   | 1662 | 149  | 0    | 80.3                     |      |
|                         | wet | 0         | 12   | 0    | 0    | 0    | 0    | 0    | 0    | 29   | 14   | 240  | 19   | 25   | 2308 | 0    | 87.2                     |      |
|                         | wat | 1         | 0    | 1    | 0    | 0    | 0    | 0    | 0    | 3    | 0    | 0    | 0    | 22   | 0    | 0    | 2593                     | 99.0 |
| prediction accuracy (%) |     | 97.3      | 81.2 | 75.2 | 95.5 | 87.2 | 80.6 | 94.9 | 98.8 | 88.5 | 90.7 | 78.1 | 67.9 | 88.1 | 76.2 | 99.0 |                          |      |
|                         |     |           |      |      |      |      |      |      |      |      |      |      |      |      |      |      |                          |      |

b) Simplified classification scheme

|                         |     | predicted |      |      |      |      |      | observation accuracy (%) |
|-------------------------|-----|-----------|------|------|------|------|------|--------------------------|
|                         |     | cru       | veg  | bgg  | wat  | gru  | wdw  |                          |
| observed                | cru | 709       | 27   | 6    | 0    | 0    | 11   | 74.3                     |
|                         | veg | 0         | 1138 | 2    | 0    | 1    | 46   | 96.1                     |
|                         | bgg | 0         | 17   | 974  | 0    | 26   | 1    | 80.6                     |
|                         | wat | 0         | 0    | 0    | 534  | 0    | 0    | 97.5                     |
|                         | gru | 0         | 8    | 4    | 0    | 973  | 22   | 66.8                     |
|                         | wdw | 7         | 65   | 0    | 0    | 16   | 411  | 51.9                     |
| prediction accuracy (%) |     | 78.4      | 87.3 | 78.0 | 99.7 | 86.2 | 73.0 |                          |

c) Optimized classification scheme

|                         |     | predicted |      |      |      |      |      |      |      |      |      |      |      |      |                          |  |  |  |
|-------------------------|-----|-----------|------|------|------|------|------|------|------|------|------|------|------|------|--------------------------|--|--|--|
|                         |     | bgr       | cas  | csu  | dry  | gra  | mbr  | meq  | gru  | wdc  | mgr  | wet  | hea  | wat  | observation accuracy (%) |  |  |  |
| observed                | bgr | 695       | 0    | 0    | 0    | 19   | 0    | 0    | 44   | 32   | 0    | 3    | 11   | 3    | 86.1                     |  |  |  |
|                         | cas | 0         | 1020 | 0    | 29   | 0    | 0    | 0    | 26   | 198  | 0    | 19   | 3    | 10   | 78.2                     |  |  |  |
|                         | csu | 0         | 0    | 534  | 0    | 0    | 0    | 0    | 0    | 0    | 0    | 0    | 0    | 0    | 100                      |  |  |  |
|                         | dry | 0         | 11   | 0    | 976  | 12   | 0    | 4    | 16   | 184  | 2    | 49   | 0    | 0    | 77.8                     |  |  |  |
|                         | gra | 15        | 0    | 0    | 25   | 409  | 0    | 0    | 11   | 112  | 3    | 0    | 0    | 0    | 71.1                     |  |  |  |
|                         | mbr | 0         | 9    | 0    | 0    | 0    | 284  | 0    | 1    | 0    | 0    | 50   | 1    | 0    | 82.3                     |  |  |  |
|                         | meq | 0         | 14   | 0    | 11   | 0    | 0    | 1071 | 19   | 10   | 105  | 37   | 0    | 0    | 84.5                     |  |  |  |
|                         | gru | 18        | 28   | 30   | 33   | 8    | 0    | 85   | 2073 | 102  | 71   | 183  | 15   | 0    | 78.3                     |  |  |  |
|                         | wdc | 19        | 348  | 0    | 44   | 43   | 0    | 2    | 44   | 2420 | 1    | 40   | 49   | 0    | 80.4                     |  |  |  |
|                         | mgr | 0         | 19   | 0    | 11   | 22   | 0    | 17   | 104  | 69   | 1685 | 138  | 6    | 0    | 81.4                     |  |  |  |
|                         | wet | 0         | 0    | 0    | 0    | 0    | 1    | 49   | 286  | 64   | 31   | 2198 | 18   | 0    | 83.0                     |  |  |  |
|                         | hea | 0         | 0    | 0    | 11   | 0    | 1    | 0    | 13   | 2    | 0    | 80   | 2307 | 0    | 95.6                     |  |  |  |
| wat                     | 4   | 2         | 0    | 0    | 0    | 0    | 0    | 0    | 17   | 0    | 0    | 0    | 2708 | 99.2 |                          |  |  |  |
| prediction accuracy (%) |     | 92.5      | 70.3 | 94.7 | 85.6 | 79.7 | 99.3 | 87.2 | 78.6 | 75.4 | 88.8 | 78.6 | 95.7 | 99.5 |                          |  |  |  |
