# Supplementary material
Source: MDPI journal article supplement (https://www.mdpi.com/2072-4292/13/21/4466)
Supplement: s1 [file s1]

```
### RF MODEL WITH ALL DATA (not splitting and therefore no loop necessary)
#change the class values from numbers to being factors
sas_rf_data<-sas_data[,c(5:69,78)]
M_sas=rminer::fit(class~.,sas_rf_data,model="randomForest", task = "class")
savemodel(M_sas,"model_name") # saves to file

### Creating a map from the model
#load model
M_sas_reload<-loadmodel("model_name")

#load the raster stack you want to use (in this case sas image map), be careful the
raster stack and model use the same column names

closeAllConnections()
beginCluster()
sas_preds_rf <- clusterR(sas_image_map, raster::predict, args = list(model =
M_sas_reload))
endCluster()

#save the output
writeRaster(sas_preds_rf, "sas_result_optimized.tif", overwrite=TRUE)
```
