# Supplementary material
Source: MDPI journal article supplement (https://www.mdpi.com/2072-4292/13/21/4466)
Supplement: s1 [file s1]

a) Initial classification scheme

|          |                         | predicted |      |      |      |      |      |      |      |      |      |      |      |      |      | observation accuracy (%) |  |
|----------|-------------------------|-----------|------|------|------|------|------|------|------|------|------|------|------|------|------|--------------------------|--|
|          |                         | bgr       | cru  | cas  | dry  | gra  | hea  | meq  | hmo  | wat  | gru  | wdw  | mgr  | wet  |      |                          |  |
| observed | bgr                     | 149       | 25   | 0    | 0    | 18   | 0    | 0    | 0    | 1    | 9    | 7    | 0    | 0    | 71.3 |                          |  |
|          | cru                     | 2         | 178  | 6    | 1    | 23   | 8    | 0    | 2    | 0    | 25   | 142  | 0    | 0    | 46.0 |                          |  |
|          | cas                     | 0         | 1    | 587  | 4    | 0    | 0    | 7    | 21   | 0    | 57   | 6    | 4    | 0    | 85.4 |                          |  |
|          | dry                     | 0         | 1    | 4    | 258  | 3    | 6    | 14   | 1    | 0    | 8    | 7    | 17   | 0    | 80.9 |                          |  |
|          | gra                     | 18        | 36   | 0    | 0    | 380  | 2    | 0    | 0    | 0    | 0    | 12   | 0    | 0    | 84.8 |                          |  |
|          | hea                     | 0         | 3    | 9    | 9    | 0    | 222  | 0    | 25   | 0    | 0    | 16   | 0    | 0    | 78.2 |                          |  |
|          | meq                     | 0         | 0    | 1    | 3    | 0    | 0    | 152  | 2    | 0    | 0    | 0    | 7    | 11   | 86.4 |                          |  |
|          | hmo                     | 0         | 0    | 28   | 0    | 0    | 17   | 2    | 96   | 0    | 42   | 10   | 14   | 0    | 45.9 |                          |  |
|          | wat                     | 8         | 0    | 0    | 0    | 5    | 0    | 0    | 0    | 228  | 11   | 0    | 0    | 0    | 90.5 |                          |  |
|          | gru                     | 0         | 21   | 1    | 4    | 0    | 2    | 0    | 0    | 0    | 820  | 2    | 34   | 15   | 91.2 |                          |  |
|          | wdw                     | 2         | 120  | 24   | 9    | 5    | 26   | 0    | 0    | 0    | 0    | 895  | 0    | 0    | 82.8 |                          |  |
|          | mgr                     | 0         | 1    | 0    | 7    | 0    | 0    | 15   | 0    | 0    | 40   | 0    | 264  | 19   | 76.3 |                          |  |
|          | wet                     | 0         | 0    | 0    | 0    | 0    | 0    | 1    | 0    | 0    | 14   | 0    | 18   | 456  | 93.3 |                          |  |
|          | prediction accuracy (%) |           | 83.2 | 46.1 | 88.9 | 87.5 | 87.6 | 78.4 | 79.6 | 65.3 | 99.6 | 79.9 | 81.6 | 73.7 | 91.0 |                          |  |

### b) Simplified classification scheme

|                         |     | predicted |      |      |      |      |      |                          |  |  |  |  |
|-------------------------|-----|-----------|------|------|------|------|------|--------------------------|--|--|--|--|
|                         |     | bgg       | cru  | wat  | gru  | wdw  | veg  | observation accuracy (%) |  |  |  |  |
| observed                | bgg | 546       | 51   | 3    | 6    | 14   | 1    | 87.9                     |  |  |  |  |
|                         | cru | 60        | 149  | 0    | 17   | 122  | 39   | 38.5                     |  |  |  |  |
|                         | wat | 13        | 0    | 240  | 8    | 0    | 1    | 91.6                     |  |  |  |  |
|                         | gru | 2         | 22   | 0    | 775  | 0    | 103  | 85.9                     |  |  |  |  |
|                         | wdw | 16        | 128  | 0    | 0    | 980  | 58   | 82.9                     |  |  |  |  |
|                         | veg | 0         | 0    | 0    | 38   | 28   | 2474 | 97.4                     |  |  |  |  |
| prediction accuracy (%) |     | 85.7      | 42.6 | 98.8 | 91.8 | 85.7 | 92.5 |                          |  |  |  |  |

c) Optimized classification scheme

|                         |     | predicted |      |      |      |      |      |      |      |      |      |      |                          |  |  |  |
|-------------------------|-----|-----------|------|------|------|------|------|------|------|------|------|------|--------------------------|--|--|--|
|                         |     | bgr       | cas  | dry  | gra  | meq  | wat  | gru  | wdc  | hea  | mgr  | wet  | observation accuracy (%) |  |  |  |
| observed                | bgr | 143       | 0    | 0    | 17   | 0    | 2    | 5    | 41   | 0    | 0    | 0    | 68.8                     |  |  |  |
|                         | cas | 0         | 614  | 10   | 0    | 1    | 0    | 30   | 9    | 5    | 3    | 0    | 91.4                     |  |  |  |
|                         | dry | 0         | 4    | 235  | 2    | 11   | 0    | 13   | 14   | 7    | 8    | 4    | 78.9                     |  |  |  |
|                         | gra | 17        | 0    | 0    | 370  | 0    | 0    | 0    | 57   | 1    | 0    | 0    | 83.1                     |  |  |  |
|                         | meq | 0         | 2    | 5    | 0    | 151  | 0    | 0    | 0    | 1    | 8    | 8    | 86.3                     |  |  |  |
|                         | wat | 4         | 0    | 0    | 8    | 0    | 219  | 15   | 0    | 0    | 0    | 0    | 89.0                     |  |  |  |
|                         | gru | 0         | 1    | 9    | 0    | 0    | 0    | 824  | 28   | 6    | 19   | 11   | 91.8                     |  |  |  |
|                         | wdc | 9         | 20   | 8    | 37   | 0    | 0    | 21   | 1340 | 25   | 0    | 0    | 91.8                     |  |  |  |
|                         | hea | 0         | 22   | 8    | 0    | 4    | 0    | 46   | 52   | 339  | 20   | 0    | 69.0                     |  |  |  |
|                         | mgr | 0         | 0    | 7    | 0    | 12   | 0    | 52   | 8    | 0    | 253  | 15   | 72.9                     |  |  |  |
| wet                     | 0   | 0         | 0    | 0    | 4    | 0    | 12   | 0    | 0    | 16   | 455  | 93.4 |                          |  |  |  |
| prediction accuracy (%) |     | 82.7      | 92.6 | 83.3 | 85.3 | 82.5 | 99.1 | 80.9 | 86.5 | 88.3 | 77.4 | 92.3 |                          |  |  |  |
