# Supplementary material
Source: MDPI journal article supplement (https://www.mdpi.com/2072-4292/13/21/4466)
Supplement: s1 [file s1]

a) Initial classification scheme

|                         |     | predicted |      |      |      |      |      |      |      |      |     |      |      |      |      |      |                          |
|-------------------------|-----|-----------|------|------|------|------|------|------|------|------|-----|------|------|------|------|------|--------------------------|
|                         |     | bgr       | cru  | cas  | dry  | gra  | hea  | wdm  | meq  | hmo  | sno | wat  | gru  | wdw  | mgr  | wet  | observation accuracy (%) |
| observed                | bgr | 112       | 3    | 0    | 0    | 0    | 0    | 0    | 0    | 0    | 0   | 14   | 11   | 0    | 0    | 0    | 80.0                     |
|                         | cru | 0         | 283  | 5    | 0    | 121  | 0    | 0    | 0    | 3    | 0   | 7    | 21   | 60   | 0    | 0    | 56.6                     |
|                         | cas | 0         | 12   | 1469 | 0    | 0    | 240  | 0    | 0    | 49   | 0   | 17   | 29   | 164  | 0    | 0    | 74.2                     |
|                         | dry | 0         | 0    | 0    | 971  | 3    | 39   | 0    | 0    | 2    | 0   | 0    | 0    | 0    | 0    | 0    | 95.7                     |
|                         | gra | 0         | 51   | 0    | 2    | 1022 | 0    | 0    | 0    | 0    | 0   | 0    | 0    | 0    | 0    | 0    | 95.1                     |
|                         | hea | 0         | 6    | 4    | 44   | 1    | 502  | 0    | 0    | 0    | 0   | 0    | 0    | 0    | 0    | 0    | 90.1                     |
|                         | wdm | 0         | 6    | 0    | 0    | 3    | 0    | 429  | 0    | 0    | 0   | 0    | 29   | 0    | 0    | 0    | 91.9                     |
|                         | meq | 0         | 0    | 0    | 0    | 0    | 0    | 0    | 377  | 0    | 0   | 0    | 0    | 0    | 32   | 15   | 88.9                     |
|                         | hmo | 0         | 0    | 14   | 6    | 0    | 31   | 0    | 0    | 170  | 0   | 0    | 16   | 30   | 14   | 0    | 60.5                     |
|                         | sno | 0         | 0    | 0    | 0    | 0    | 0    | 0    | 0    | 0    | 113 | 0    | 0    | 0    | 0    | 0    | 100                      |
|                         | wat | 1         | 0    | 12   | 0    | 18   | 0    | 5    | 0    | 0    | 0   | 1078 | 35   | 0    | 0    | 9    | 93.1                     |
|                         | gru | 0         | 29   | 0    | 0    | 0    | 3    | 11   | 0    | 0    | 0   | 0    | 1132 | 0    | 44   | 32   | 90.5                     |
|                         | wdw | 0         | 465  | 112  | 0    | 0    | 0    | 0    | 0    | 82   | 0   | 3    | 3    | 1089 | 0    | 0    | 62.1                     |
|                         | mgr | 0         | 0    | 0    | 0    | 0    | 1    | 0    | 43   | 0    | 0   | 0    | 18   | 0    | 622  | 60   | 83.6                     |
|                         | wet | 0         | 0    | 0    | 0    | 0    | 0    | 0    | 0    | 0    | 0   | 0    | 58   | 0    | 21   | 1094 | 93.3                     |
| prediction accuracy (%) |     | 99.1      | 33.1 | 90.9 | 94.9 | 87.5 | 61.5 | 96.4 | 89.8 | 55.6 | 100 | 96.3 | 83.7 | 81.1 | 84.9 | 90.4 |                          |

b) Simplified classification scheme

|                         |     | predicted |     |     |      |      |      |      | observation accuracy (%) |
|-------------------------|-----|-----------|-----|-----|------|------|------|------|--------------------------|
|                         |     | cru       | sno | wat | veg  | bgg  | gru  | wdc  |                          |
| observed                | cru | 272       | 0   | 2   | 11   | 112  | 33   | 59   | 55.6                     |
|                         | sno | 0         | 132 | 0   | 0    | 0    | 0    | 0    | 100                      |
|                         | wat | 7         | 0   | 933 | 86   | 35   | 27   | 71   | 80.5                     |
|                         | veg | 1         | 0   | 2   | 5984 | 18   | 21   | 115  | 97.4                     |
|                         | bgg | 65        | 0   | 5   | 4    | 1133 | 11   | 0    | 93                       |
|                         | gru | 16        | 0   | 2   | 94   | 2    | 1138 | 0    | 90.9                     |
|                         | wdc | 445       | 0   | 8   | 230  | 0    | 8    | 941  | 57.7                     |
| prediction accuracy (%) |     | 33.7      | 100 | 98  | 93.4 | 87.2 | 91.9 | 79.3 |                          |

c) Optimized classification scheme

|                         |     | predicted |      |      |      |      |     |      |      |      |      |      |      | observation accuracy (%) |
|-------------------------|-----|-----------|------|------|------|------|-----|------|------|------|------|------|------|--------------------------|
|                         |     | bgr       | cas  | dry  | gra  | meq  | sno | wat  | gru  | wdc  | hea  | mgr  | wet  |                          |
| observed                | bgr | 131       | 0    | 0    | 0    | 0    | 0   | 5    | 0    | 4    | 0    | 0    | 0    | 93.6                     |
|                         | cas | 0         | 1443 | 0    | 0    | 0    | 0   | 24   | 39   | 216  | 279  | 0    | 0    | 72.1                     |
|                         | dry | 0         | 0    | 1015 | 8    | 0    | 0   | 0    | 0    | 0    | 32   | 0    | 0    | 96.2                     |
|                         | gra | 0         | 0    | 4    | 1024 | 0    | 0   | 0    | 0    | 49   | 1    | 0    | 0    | 95.0                     |
|                         | meq | 0         | 0    | 0    | 0    | 383  | 0   | 0    | 0    | 0    | 0    | 22   | 17   | 90.8                     |
|                         | sno | 0         | 0    | 0    | 0    | 0    | 116 | 0    | 0    | 0    | 0    | 0    | 0    | 100                      |
|                         | wat | 7         | 4    | 0    | 14   | 0    | 0   | 913  | 6    | 130  | 0    | 0    | 8    | 84.4                     |
|                         | gru | 0         | 0    | 0    | 0    | 1    | 0   | 4    | 1144 | 28   | 0    | 45   | 32   | 91.2                     |
|                         | wdc | 0         | 108  | 0    | 118  | 0    | 0   | 16   | 16   | 1936 | 29   | 0    | 0    | 87.1                     |
|                         | hea | 0         | 16   | 62   | 0    | 0    | 0   | 7    | 50   | 698  | 6    | 0    | 0    | 83.2                     |
|                         | mgr | 0         | 0    | 0    | 0    | 50   | 0   | 0    | 16   | 2    | 2    | 623  | 50   | 83.8                     |
|                         | wet | 3         | 0    | 0    | 0    | 1    | 0   | 0    | 50   | 0    | 0    | 22   | 1096 | 93.5                     |
| prediction accuracy (%) |     | 92.9      | 91.9 | 93.9 | 88.0 | 88.0 | 100 | 94.9 | 89.5 | 80.2 | 67.1 | 86.8 | 91.1 |                          |
